# Supplementary material
Source: Springer Nature journal article supplement (https://www.springermedizin.de/resource/supplementary/12911_2014_841_MOESM1_ESM.pdf/9526774)
Supplement: MOESM1 [file 9526774]

First stage: qualitative study

First focus group :  
difficulties encountered  
by physicians when  
reading CPGs



Second focus group :  
how VCM could help with  
regard to these  
difficulties

Second stage:

Interface design

User-centered  
design

Third stage:

evaluation study

Performance  
evaluation
